# Supplementary material
Source: ML conference proceedings conference paper supplement (https://openreview.net/forum?id=fagTLzHFBs)
Supplement: supplementary_material [file attachment]

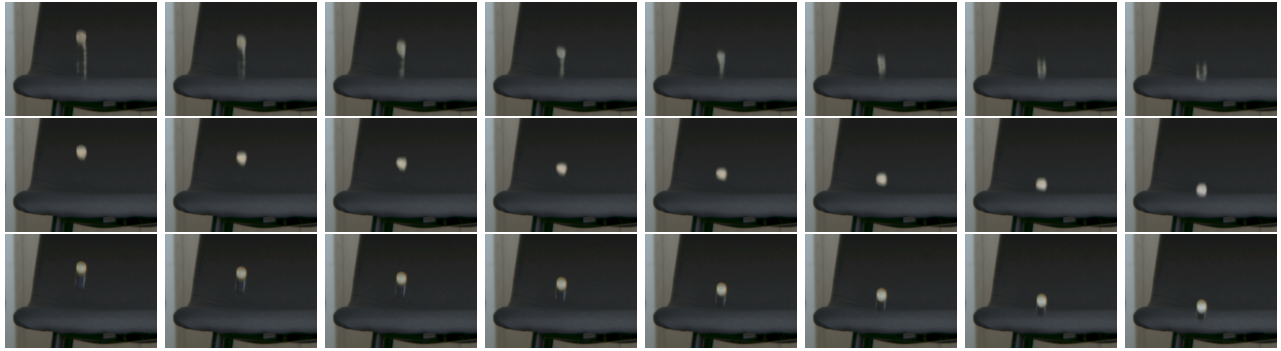

Figure 1: Qualitative results of Falling sequence *cell*. Method: **top row**: linear interpolation, **mid row**: affine interpolation, **bottom row**: groundtruth.

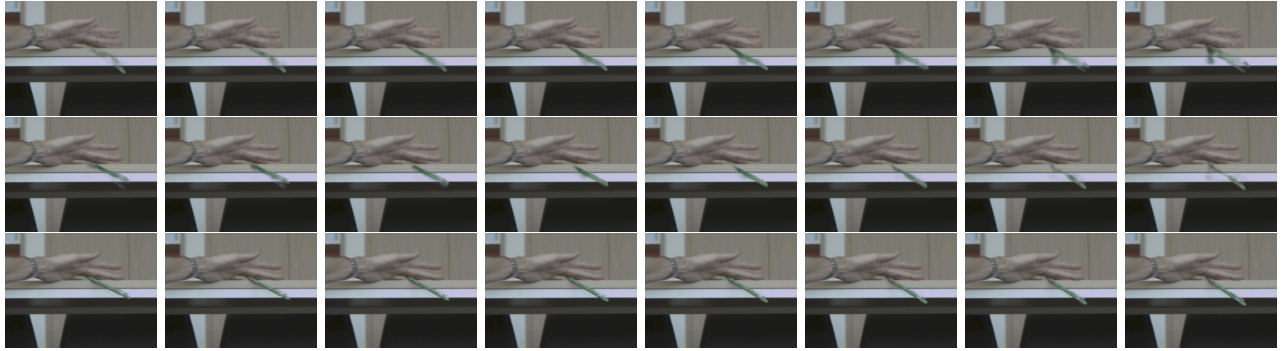

Figure 2: Qualitative results of Falling sequence *pen*. Method: **top row**: linear interpolation, **mid row**: affine interpolation, **bottom row**: groundtruth.
